# Supplementary material
Source: HighWire-hosted journal article supplement (http://molpharm.aspetjournals.org/highwire/filestream/76546/field_highwire_adjunct_files/1/Figure_2_SD.pdf)
Supplement: Figure_2_SD.pdf [file Figure_2_SD.pdf]

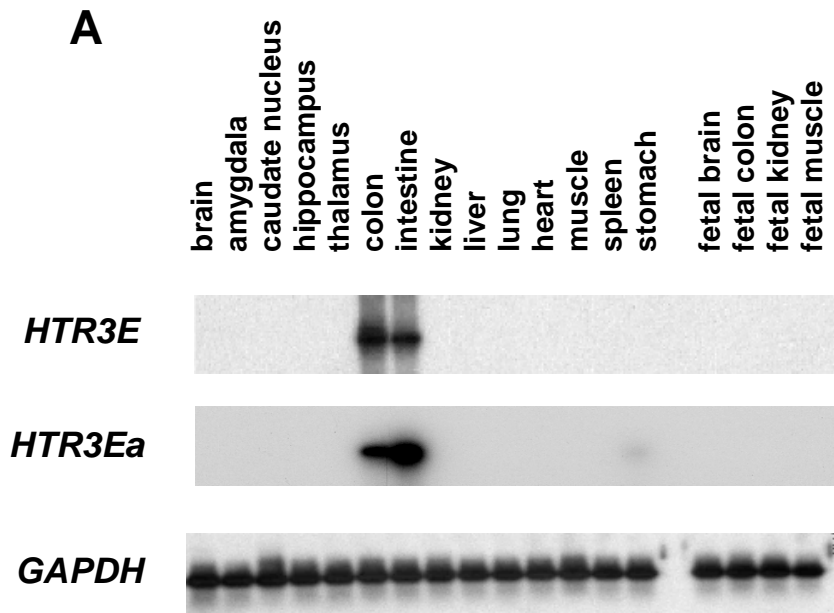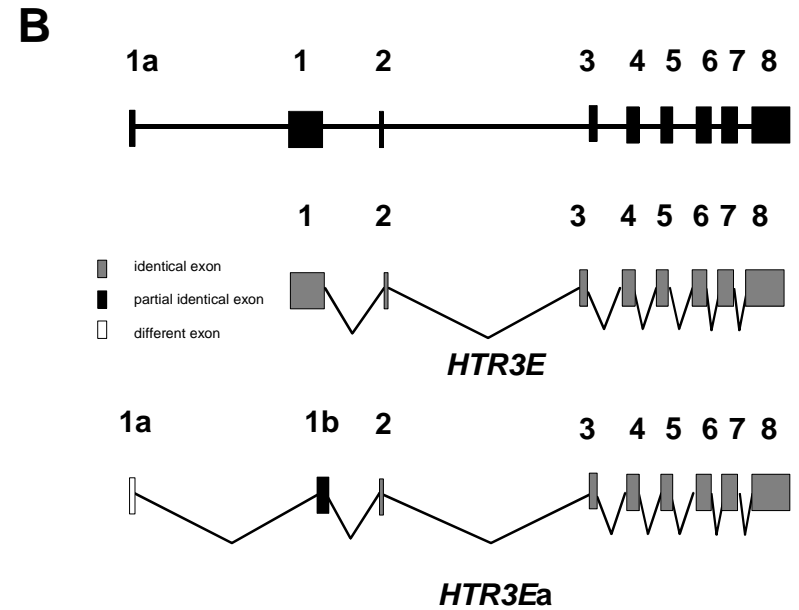

**C**

5-HT3A -----MLLWVQALLALLPTLLAQGEARRSRNTTRPALLRLSDYLL  
 5-HT3B -----MLSSVMAPLWACIL--VAA GILATDTHHPQDSALYHLSKQLL  
 5-HT3C -----MEGGWPARQSALLCLTVSLLLQGRGDAFTINCSGFDQHGVDPAVF  
 5-HT3E **MLAFILSRATPRPALG**PLSYREHRVALLHLTHSMSTTGRGVTFTINCSGFGQHGADPTAL  
 5-HT3Ea -----MEGSWFHRKRFSFYLLLLGFLLQGRGVTFTINCSGFGQHGADPTAL

Figure 2
